# Temporal switching of species roles in a plant–pollinator network

Vincent Miele<sup>1</sup>, Rodrigo Ramos-Jiliberto<sup>2</sup> and Diego P. Vázquez<sup>3,4,5</sup>

<sup>1</sup> Université de Lyon, F-69000 Lyon; Université Lyon 1; CNRS, UMR5558, Laboratoire de Biométrie et Biologie Évolutive, F-69622 Villeurbanne, France. E-mail:

vincent.miele@univ-lyon1.fr.

<sup>2</sup> GEMA Center for Genomics, Ecology & Environment, Universidad Mayor, Camino La Pirámide 5750, Huechuraba, Santiago, Chile. E-mail: rodrigo.ramos@umayor.cl.

<sup>3</sup> Argentine Institute for Dryland Research, CONICET, Mendoza, Argentina

<sup>4</sup> Freiburg Institute for Advanced Studies, University of Freiburg, Freiburg im Breisgau, Germany

<sup>5</sup> Faculty of Exact and Natural Sciences, National University of Cuyo, Mendoza, Argentina.

E-mail: dvazquez@mendoza-conicet.gob.ar.

**Running title:** Dynamics of a plant–pollinator network

**Keywords:** core–periphery structure, stochastic block model, mutualistic networks, plant–pollinator interactions, species role, temporal dynamics

**Article type:** Letter

**Document statistics:** Words in abstract: 143. Words in main text (excluding abstract, acknowledgements, references, table and figure legends): 2812. Number of references in main text: 35. Number of figures in main text: 4.

**Corresponding author:** Diego P. Vázquez, Argentine Institute for Dryland Research, CCT CONICET Mendoza, Av. Ruiz Leal s/n, 5500 Mendoza, Argentina. Phone: +54 261 524 4121. Fax: +54 261 524 4001. E-mail: dvazquez@mendoza-conicet.gob.ar.

**Author's contributions:** VM, RRJ and DV conceived the study. VM conducted the analyses. VM, RRJ and DV wrote the manuscript. All the authors gave final approval for publication.

**Data accessibility statement:** This study was performed with the R package `dynsbm` Miele & Matias (2017) available on CRAN at <https://cran.r-project.org/web/packages/dynsbm/>. The authors confirm that, should the manuscript be accepted, the data and code supporting the results will be archived in an appropriate public repository and the data DOI will be included at the end of the article.

## 1 **Abstract**

2 Mutualistic networks are highly dynamic, characterized by high temporal turnover of species  
3 and interactions. Yet, we have a limited understanding of how the internal structure of these  
4 networks and the roles species play in them vary through time. We used six years of obser-  
5 vation data and a novel statistical method (dynamic stochastic block models) to assess how  
6 network structure and species roles change across time in a quantitative plant–pollinator  
7 network from a dryland ecosystem in Argentina. Our analyses revealed a core–periphery  
8 structure persistent through seasons and years. Yet, species roles as core or peripheral were  
9 highly dynamic: virtually all species that played a core role in some seasons were also pe-  
10 ripheral in other seasons, while many other species remained always peripheral. Our results  
11 illuminate our understanding of the dynamics of ecological networks and have important  
12 implications for ecosystem management and conservation.

## 13 Introduction

14 Plant–animal mutualistic interactions are organized in complex networks characterized by  
15 several pervasive structural features, including nestedness (Bascompte *et al.*, 2003), modu-  
16 larity (Olesen *et al.*, 2007), and asymmetry in both specialization (Vázquez & Aizen, 2004)  
17 and interaction strength (Bascompte *et al.*, 2006). These properties have important impli-  
18 cations for ecological and evolutionary dynamics (Thébault & Fontaine, 2010; Rohr *et al.*,  
19 2014; Bascompte & Jordano, 2014). Mutualistic networks are also highly dynamic, with  
20 species and interactions switching on and off through time. In other words, these networks  
21 are characterized by a high temporal turnover of species and interactions (Petanidou *et al.*,  
22 2008; CaraDonna *et al.*, 2017; Chacoff *et al.*, 2018), in spite of an apparent invariance in  
23 aggregate network attributes such as connectance and nestedness (Petanidou *et al.*, 2008;  
24 Nielsen & Bascompte, 2007). What we still don’t understand is how much the internal struc-  
25 ture of ecological interaction networks varies through time. In addition, little is known about  
26 the temporal variation of species “roles”—the structural position of a species in terms of  
27 its connections to other species in the network (Guimera & Amaral, 2005). Studying the  
28 temporal dynamics of species roles is essential to understand how different species contribute  
29 to community stability and to guide management and conservation efforts.

30 In many previous studies, plant–animal mutualistic networks were analyzed in light of two  
31 structural properties, modularity (Olesen *et al.*, 2007) and nestedness (Pawar, 2014), with the  
32 appropriate detection methods (e.g., Dormann & Strauss, 2014; Almeida-Neto *et al.*, 2008,  
33 respectively). Species roles were defined accordingly in terms of their pattern of intra- and  
34 inter-module connections or their position in the nested network (e.g., highly versus little con-  
35 nected species). However, focusing only on these two properties is arguably too restrictive,  
36 as networks can show other relevant structural properties (see Figure 1 in Michalska-Smith  
37 *et al.*, 2018; Betzel *et al.*, 2018). To circumvent this problem, some authors have suggested  
38 the use of “agnostic” methods, which jointly infer structural properties and species roles  
39 without any *a priori* assumption. These methods represent a paradigm shift in the study of

40 networks: instead of searching for a particular pattern, we infer one from the data. Thus,  
41 assortative (modules) or disassortative, core–periphery, hierarchical or other types of struc-  
42 tures (including random) can be identified in the data. Originally developed in the field of  
43 social sciences (Holland *et al.*, 1983), *Stochastic Block Models* (SBM; Newman & Leicht, 2007;  
44 Daudin *et al.*, 2008) (also called *Group Models*; Allesina & Pascual, 2009) have emerged as a  
45 general class of agnostic models. Technically speaking, SBM aim at grouping nodes (species  
46 in our case) that are statistically equivalent, “acting” similarly in the network (“playing” the  
47 same role). This approach has been recently advocated in Ecology (Michalska-Smith *et al.*,  
48 2018; Allesina & Pascual, 2009; Leger *et al.*, 2015; Kéfi *et al.*, 2016; Ohlmann *et al.*, 2019).

49 In addition to the difficulties of identifying network structures and species roles, studying  
50 network dynamics with a similar perspective to understand role dynamics in a time series  
51 of network snapshots (i.e., in a *dynamic network*) remains a methodological challenge. The  
52 most trivial approach is to perform independent analyses on each time-specific network;  
53 under this approach, there is no role mapping between time steps  $t$  and  $t + 1$ , as roles are  
54 defined independently at each time step (Greene *et al.*, 2010), which is arguably a limitation,  
55 especially when there is node turnover. Other methods circumventing this limitation are  
56 currently emerging, most of them relying on module detection (e.g., Pilosof *et al.*, 2017;  
57 Rossetti & Cazabet, 2018). In particular, *dynamic stochastic block models* (dynSBM) (Matias  
58 & Miele, 2017) have been recently proposed as an alternative, as they have several advantages  
59 over other available methods: (1) they were developed in the agnostic framework which, as  
60 we pointed out above, does not assume *a priori* any particular type of network structure; (2)  
61 they can handle bipartite networks (such as plant–pollinator); (3) they can model interaction  
62 weights (i.e., beyond the binary case); and (4) they were designed to explicitly follow role  
63 switches in time.

64 Here we evaluate how group structure and species roles change across time in a bipartite,  
65 weighted (non-binary) plant–pollinator network spanning six years in a dryland ecosystem in  
66 Villavicencio Nature Reserve, Argentina (Chacoff *et al.*, 2018). Our network representation

67 focuses on the relative ecological effects between pairs of interacting species (usually referred  
68 to as *dependences* Bascompte *et al.*, 2006; Rohe *et al.*, 2016). Working under the dynSBM  
69 framework, we quantify the temporal switching of structural roles of plants and pollinators.  
70 This analysis allows us to provide a comprehensive picture of the temporal dynamics of the  
71 internal structure of a mutualistic network.

## 72 **Material and methods**

### 73 **Study site and data collection**

74 We used a dataset describing a plant–pollinator network from pollinator visits to flowers  
75 in a dryland ecosystem. Data were collected weekly during three months during the flow-  
76 ering season (Austral spring and early summer, September–December) between 2006 and  
77 2011 from the Monte Desert ecoregion at Villavicencio Nature Reserve, Mendoza, Argentina  
78 ( $32^{\circ} 32' S$ ,  $68^{\circ} 57' W$ , 1270 m above sea level). The data include 59 plant species, 196  
79 flower visitor species, and 28015 interaction events (flower visits) involving 1050 different  
80 pairs of interacting species. Plant abundance was estimated based on the density of flowers  
81 of each plant species, as flowers are the relevant plant structure for this interaction type.  
82 Flower abundance was estimated during the flowering season of all study years using fixed  
83 quadrats/transects. Several rare plant species were absent from our fixed quadrats and  
84 transects but present elsewhere in our study site; for those species we assigned an abundance  
85 of one flower, the minimum we could have detected with our sampling method. A full account  
86 of the methodology can be found in Chacoff *et al.* (2018, 2012).

### 87 **Building plant–pollinator dependence networks**

88 We aggregated the data by pooling the number of visits of any pollinator to any plant in 3  
89 sub-seasons by year (before November 1st, after November 30th and in between). Such level  
90 of aggregation allowed us to consider seasonal dynamics at a temporal grain that was not

91 too fine nor too coarse to allow a reasonable representation of network structure.

92 For any sub-season, we built a plant-pollinator *dependence network*  $D$ , a directed weighted  
93 network representing the relative dependences among plant and pollinator species. From the  
94 number of visits in a time interval  $X_{ij}$  between any pair of species of plant and pollinator  
95  $(i, j)$ , we considered two directed and weighted edges in  $D$ : the dependence of plant  $i$  on  
96 pollinator  $j$ ,  $D_{ij} = X_{ij} / \sum_j X_{ij}$ , representing the number of visits of pollinator  $j$  to plant  $i$   
97 divided by the total number of visits received by plant  $i$ ; and the reciprocal dependence of  
98 pollinator  $j$  on plant  $i$ ,  $D_{ji} = X_{ij} / \sum_i X_{ij}$ , representing the number of visits of pollinator  $j$   
99 to plant  $i$  divided by the total number of visits done by  $j$ . Applying this approach to our  
100 raw data, we obtained a time series of 18 dependence networks. To represent graphically  
101 these networks, we showed the successive bi-adjacency matrices (plants in rows, pollinators  
102 in columns) using a color code accounting for the two values  $D_{ij}$  and  $D_{ji}$  for any species pair  
103  $(i, j)$  (see an example in Figure 1).

#### 104 **Inferring roles in the dynamic network**

105 Recently, Matias and Miele proposed an extension of SBM for dynamic networks called  
106 dynSBM (Matias & Miele, 2017). Under this approach, role assignment is defined not only  
107 by a SBM (one per time step) but also by a Markov chain that models the role switches at  
108 each time interval. Here we rely on a modified version of this approach dedicated to bipartite  
109 networks, where each SBM has the same parameters values at each time step. Importantly,  
110 the number of groups/roles is constant and selected with an appropriate heuristics (Supple-  
111 mentary Figure S1). Role assignment (i.e., SBM group membership) can change over time,  
112 but there is no constraint for the roles to be present at each time step (see Supplementary  
113 Figure S3). Indeed, if species play, say, roles “red” and “blue” at time  $t$  but roles “red” and  
114 “yellow” at time  $t + 1$ , there will be three groups in dynSBM (red, blue and yellow). Re-  
115 lying on various statistical distributions to model edge presence and strength, dynSBM can  
116 model directed or undirected, binary or weighted edges. Here we categorize the edge weights

117 (dependence values) into three levels corresponding to *low*, *medium* and *high* dependence  
118 (lower than 0.2, in between and larger than 0.8, respectively). Thus, we used dynSBM with  
119 multinomial distributions.

## 120 Results

121 **A persistent core-periphery structure** The dynSBM algorithm selected four roles/groups  
122 of nodes (Supplementary Figure S1), two for plants and two for pollinators. The proportions  
123 of species in these groups persisted through time, in spite of being unconstrained in dynSBM  
124 (Figure 2); in contrast, these proportions varied widely in randomly perturbed networks  
125 (Supplementary Figure S3). The first group of plants (top rows of the matrices in Figure 2)  
126 consisted of species visited by many pollinator species, especially by the first group of polli-  
127 nators (left columns of the matrices in Figure 2), which visited many plant species. Species in  
128 the first groups of plants and pollinators are weakly dependent on their interaction partners  
129 (Supplementary Figure S2). Statistically speaking, these two groups form a “module” of gen-  
130 eralized plant and pollinator species with low mutual dependence among them. The second  
131 group of plants (bottom rows of the matrices in Figure 2) includes species visited mostly  
132 by pollinators of the first group; dependence is highly asymmetric for these plants, in the  
133 sense that they are highly dependent on pollinators who are not reciprocally dependent on  
134 their host plants (Supplementary Figure S2). Likewise, the second group of pollinators (right  
135 columns of the matrices in Figure 2) includes species interacting mostly with plants of the  
136 first group, also asymmetrically dependent on plants that are not reciprocally dependent on  
137 them. In addition, there are only a few interactions between species of the second groups of  
138 plants and pollinators (with no particular trend regarding the reciprocal dependence; Figure  
139 Supplementary S2).

140 The observed network organization as one persistent cohesive module plus a number of  
141 species gravitating around this module can be termed a “core-periphery” structure, with the



142 first group of plants and pollinators forming the *core* of the network and the second group  
143 representing *peripheral* species. Thus, for any time step, we observed a substantial fraction  
144 of interactions between species in the core characterized by weak reciprocal dependences  
145 (because they have many partners), plus another fraction of interactions between (plants or  
146 pollinator) species in the core and peripheral species, characterized by highly asymmetric  
147 dependences, with peripheral species depending strongly on core species, and core species  
148 depending only weakly on peripheral species (see Figure 3).

### 149 **The core–periphery structure is robust to changes in species diversity and compo-**

150 **sition** The core–periphery structure persisted despite two sources of variation: the diversity  
151 of species and their identities. First, the diversity of plant and pollinators varied over time.  
152 Each year the number of plant species in bloom tended to decrease from the first to the  
153 third sub-season, whereas the number of pollinators species tended to peak in the second  
154 sub-season (Supplementary Figure S4); yet, the proportion of core plant species increased  
155 from the first to the third sub-season (Figure 2; plant core group in the upper part of each  
156 matrix). Therefore, plant core size was not proportional to plant diversity. Second, the  
157 identity of interacting species and their *activity* (as measured by the total number of floral  
158 visits received by a plant or performed by a pollinator) changed greatly from one time step to  
159 another, resulting in substantial temporal variation in the species assembly (Supplementary  
160 Figure S5). Yet, despite these variations at the species level, the core–periphery structure  
161 persisted over time.

### 162 **Species in the core can switch their role** Species roles were highly dynamic. Almost

163 all species that were in the core at some point eventually became peripheral (except one plant  
164 and one pollinator species); however, most peripheral species never became part of the core  
165 (52% for plants, 72% for pollinators; see Figure 4). Thus, only a subset of species were ever  
166 part of the core, but virtually no species played that role persistently through time.

167 There was a positive correlation between overall species presence (i.e. the number of sub-

168 seasons a species recorded interacting) and their presence in the core: the more frequently a  
169 plant or a pollinator species was present in the community, the more frequently it was found  
170 in the core (see Figure 4 and Supplementary Figure S6). Furthermore, for plant species for  
171 which we have abundance data, we observed that their abundance tended to be higher when  
172 they are in the core than when they are peripheral (Supplementary Figure S7). Finally,  
173 contrary to our expectation, species role switching was unrelated with changes in assembly  
174 structure (Supplementary Figure S8).

## 175 Discussion

176 Our analysis of the temporal dynamics of a plant–pollinator network using dynamic stochas-  
177 tic block models revealed a core–periphery structure persistent through seasons and years.  
178 This structure was maintained despite high temporal variation in species richness and com-  
179 position. The distribution of dependences also persisted over time, with highly asymmetric  
180 dependences for most peripheral species, which tended to interact with core species; in turn,  
181 interactions among core species tended to be more symmetric, albeit with weaker depen-  
182 dences. These findings are in line with those of previous studies showing that plant–animal  
183 mutualistic networks exhibit a nested structure (Bascompte *et al.*, 2003) persistent over the  
184 years (Petanidou *et al.*, 2008; Chacoff *et al.*, 2018). Nestedness has been shown to be related  
185 to core–periphery structure (Lee, 2016), and is characterized by a core of highly connected  
186 generalist species and many peripheral species connected asymmetrically to the general-  
187 ist species in the core (Bascompte *et al.*, 2003; Vázquez & Aizen, 2004; Bascompte *et al.*,  
188 2006). The observed core–periphery structure is also related to modularity (another struc-  
189 tural feature frequent in plant–pollinator networks; Olesen *et al.*, 2007), in that we detected  
190 the persistent presence of a cohesive module (the core). Thus, our results suggest that the  
191 studied network exhibits a temporally persistent structure that is both nested and modular.

192 The novelty of our methodological approach allowed us to examine species role switching

193 with unprecedented accuracy. In contrast to the observed persistence of the core-periphery  
194 structure, we found that species roles are highly dynamic: virtually all species that played  
195 a core role in some seasons were also peripheral in other seasons, while many other species  
196 remained always peripheral. In other words, although the core-periphery structure persists  
197 over time, the taxonomic identity of the core changes drastically through seasons and years,  
198 and no species can be identified as playing permanently a core role. Thus, the plant-pollinator  
199 network studied here exhibited an enormous temporal variation not only in the occurrence  
200 of interactions, as documented by previous studies (Petanidou *et al.*, 2008; CaraDonna *et al.*,  
201 2017; Chacoff *et al.*, 2018), but also in the network roles played by interacting species.

202 The latter finding has far-reaching practical implications, as the idea of focusing manage-  
203 ment and conservation efforts on a small subset of species at the network core (Fleishman  
204 *et al.*, 2002, 2007; Hegland *et al.*, 2010; Chacoff *et al.*, 2012; García-Algarra *et al.*, 2017) may  
205 be difficult to achieve, given that no species play that role consistently over time in the long  
206 run. Thus, the identification of core species based on one or a few years of sampling—as  
207 done in most studies published so far—could be misleading. In fact, as we have shown, only  
208 a small fraction of species found in the core of the network at a given time are actually found  
209 consistently at the network core through seasons and years. Therefore, it is unlikely that a  
210 single static characterization of an ecological network could reveal its true core species. In  
211 contrast, our results suggest that the identification of core species as candidates for man-  
212 agement actions requires allocating a greater sampling effort into capturing the temporal  
213 dynamics of ecosystems, although this practice could imply relaxing efforts into capturing  
214 detailed community structure and detection of very rare species, which which are unlikely  
215 to be part of the network core. That said, our findings do indicate that certain species are  
216 likely to be found playing a key role as part of the network core in most seasons and years,  
217 which would make them adequate targets for conservation efforts. Plant species in this group  
218 include *Condalia microphilla*, *Larrea divaricata*, *Prosopis flexuosa* and *Zuccagnia punctata*,  
219 all of which had been identified in a previous study as part of the network core of the nested

220 network constructed based on four years of data (Chacoff *et al.*, 2012). Likewise, flower  
221 visitors in this group included *Apis mellifera*, *Augchloropsis* sp., *Bombus opiphex*, *Centris*  
222 *brethesi*, *Copestylum aricia*, and *Xylocopa atamisquensis*, which had again been identified in  
223 the same study (Chacoff *et al.*, 2012) as part of the core of the nested network.

224 To conclude, we have attempted to assess the temporal dynamics of the structure of  
225 a plant–pollinator network using a novel agnostic method that allows detecting multiple  
226 classes of structures in systems with high species and interaction turnover through time.  
227 These results are intriguing, and illuminate our understanding of the dynamics of ecological  
228 networks, indicating the persistence of a core–periphery structure in spite of substantial  
229 changes in species richness, composition, interactions and roles. Yet, we believe we have  
230 only scratched the surface of the temporal dynamics of ecological networks. Future studies  
231 should apply the methods used here to analyze other datasets, to assess the generality of our  
232 findings.

## 233 Acknowledgements

234 VM would like to thank Sébastien Ibanez and Hugo Fort for their fruitful comments. Fund-  
235 ing was provided by the French National Center for Scientific Research (CNRS) and the  
236 French National Research Agency (ANR) grant ANR-18-CE02-0010-01 EcoNet (VM), CON-  
237 ICYT/FONDECYT grant 1150348 (RRJ), a FONCYT grant PICT-2014-3168 (DPV), the  
238 People Programme (Marie Curie Actions) of the European Union’s Seventh Framework Pro-  
239 gramme (FP7/2007-2013, REA grant agreement 609305) (DPV), and a Bessel Research  
240 Award from Alexander von Humboldt Foundation (DPV).

## 241 References

242 Allesina, S. & Pascual, M. (2009). Food web models: a plea for groups. *Ecol. Lett.*, 12,  
243 652–662.

- 244 Almeida-Neto, M., Guimaraes, P., Guimaraes Jr, P. R., Loyola, R. D. & Ulrich, W. (2008).  
245 A consistent metric for nestedness analysis in ecological systems: reconciling concept and  
246 measurement. *Oikos*, 117, 1227–1239.
- 247 Bascompte, J. & Jordano, P. (2014). *Mutualistic networks*. Princeton University Press.
- 248 Bascompte, J., Jordano, P., Melián, C. J. & Olesen, J. M. (2003). The nested assembly of  
249 plant-animal mutualistic networks. *Proceedings of the National Academy of Sciences USA*,  
250 100, 9383–9387.
- 251 Bascompte, J., Jordano, P. & Olesen, J. M. (2006). Asymmetric coevolutionary networks  
252 facilitate biodiversity maintenance. *Science*, 312, 431–433.
- 253 Betzel, R. F., Medaglia, J. D. & Bassett, D. S. (2018). Diversity of meso-scale architecture  
254 in human and non-human connectomes. *Nature Communications*, 9, 346.
- 255 CaraDonna, P. J., Petry, W. K., Brennan, R. M., Cunningham, J. L., Bronstein, J. L.,  
256 Waser, N. M. & Sanders, N. J. (2017). Interaction rewiring and the rapid turnover of  
257 plant–pollinator networks. *Ecology Letters*, n/a–n/a.
- 258 Chacoff, N. P., Resasco, J. & Vázquez, D. P. (2018). Interaction frequency, network position,  
259 and the temporal persistence of interactions in a plant–pollinator network. *Ecology*, 99,  
260 21–28.
- 261 Chacoff, N. P., Vázquez, D. P., Lomáscolo, S. B., Stevani, E. L., Dorado, J. & Padrón, B.  
262 (2012). Evaluating sampling completeness in a desert plant–pollinator network. *Journal*  
263 *of Animal Ecology*, 81, 190–200.
- 264 Daudin, J. J., Picard, F. & Robin, S. (2008). A mixture model for random graphs. *Statistics*  
265 *and Computing*, 18, 173–183.
- 266 Dormann, C. F. & Strauss, R. (2014). A method for detecting modules in quantitative  
267 bipartite networks. *Methods in Ecology and Evolution*, 5, 90–98.

- 268 Fleishman, E., Betrus, C. J., Blair, R. B., Mac Nally, R. & Murphy, D. D. (2002). Nestedness  
269 analysis and conservation planning: the importance of place, environment, and life history  
270 across taxonomic groups. *Oecologia*, 133, 78–89.
- 271 Fleishman, E., Donnelly, R., Fay, J. P. & Reeves, R. (2007). Applications of nestedness anal-  
272 yses to biodiversity conservation in developing landscapes. *Landscape and Urban Planning*,  
273 81, 271–281.
- 274 García-Algarra, J., Pastor, J. M., Iriondo, J. M. & Galeano, J. (2017). Ranking of critical  
275 species to preserve the functionality of mutualistic networks using the  $k$ -core decomposi-  
276 tion. *PeerJ*, e3321.
- 277 Greene, D., Doyle, D. & Cunningham, P. (2010). Tracking the evolution of communities in  
278 dynamic social networks. In: *Advances in social networks analysis and mining (ASONAM),*  
279 *2010 international conference on*. IEEE.
- 280 Guimera, R. & Amaral, L. A. N. (2005). Cartography of complex networks: modules and  
281 universal roles. *Journal of Statistical Mechanics: Theory and Experiment*, 2005, P02001.
- 282 Hegland, S. J., Dunne, J., Nielsen, A. & Memmott, J. (2010). How to monitor ecological  
283 communities cost-efficiently: The example of plant-pollinator networks. *Biological Conser-*  
284 *vation*, 143, 2092–2101.
- 285 Holland, P. W., Laskey, K. B. & Leinhardt, S. (1983). Stochastic blockmodels: First steps.  
286 *Social networks*, 5, 109–137.
- 287 Kéfi, S., Miele, V., Wieters, E. A., Navarrete, S. A. & Berlow, E. L. (2016). How structured is  
288 the entangled bank? The surprisingly simple organization of multiplex ecological networks  
289 leads to increased persistence and resilience. *PLoS Biology*, 14.
- 290 Lee, S. H. (2016). Network nestedness as generalized core-periphery structures. *Phys. Rev.*  
291 *E*, 93, 022306.

- 292 Leger, J.-B., Daudin, J.-J. & Vacher, C. (2015). Clustering methods differ in their ability to  
293 detect patterns in ecological networks. *Methods in Ecology and Evolution*, 6, 474–481.
- 294 Matias, C. & Miele, V. (2017). Statistical clustering of temporal networks through a dynamic  
295 stochastic block model. *Journal of the Royal Statistical Society: Series B (Statistical  
296 Methodology)*, 79, 1119–1141.
- 297 Michalska-Smith, M. J., Sander, E. L., Pascual, M. & Allesina, S. (2018). Understanding the  
298 role of parasites in food webs using the group model. *J Anim Ecol*, 87, 790–800.
- 299 Miele, V. & Matias, C. (2017). Revealing the hidden structure of dynamic ecological networks.  
300 *Royal Society Open Science*, 4, 170251.
- 301 Newman, M. E. J. & Leicht, E. A. (2007). Mixture models and exploratory analysis in  
302 networks. *Proceedings of the National Academy of Sciences*, 104, 9564–9569.
- 303 Nielsen, A. & Bascompte, J. (2007). Ecological networks, nestedness and sampling effort.  
304 *Journal of Ecology*, 95, 1134–1141.
- 305 Ohlmann, M., Miele, V., Dray, S., Chalmandrier, L., O'Connor, L. & Thuiller, W. (2019).  
306 Diversity indices for ecological networks: a unifying framework using hill numbers. *Ecology  
307 Letters*.
- 308 Olesen, J. M., Bascompte, J., Dupont, Y. L. & Jordano, P. (2007). The modularity of  
309 pollination networks. *Proceedings of the National Academy of Sciences*, 104, 19891–19896.
- 310 Pawar, S. (2014). Ecology. Why are plant-pollinator networks nested? *Science*, 345, 383.
- 311 Petanidou, T., Kallimanis, A. S., Tzanopoulos, J., Sgardelis, S. P. & Pantis, J. D. (2008).  
312 Long-term observation of a pollination network: fluctuation in species and interactions,  
313 relative invariance of network structure and implications for estimates of specialization.  
314 *Ecology Letters*, 11, 564–575.

- 315 Pilosof, S., Porter, M. A., Pascual, M. & Kéfi, S. (2017). The multilayer nature of ecological  
316 networks. *Nature Ecology & Evolution*, 1, 0101.
- 317 Rohe, K., Qin, T. & Yu, B. (2016). Co-clustering directed graphs to discover asymmetries  
318 and directional communities. *Proceedings of the National Academy of Sciences*, 113, 12679–  
319 12684.
- 320 Rohr, R. P., Saavedra, S. & Bascompte, J. (2014). On the structural stability of mutualistic  
321 systems. *Science*, 345.
- 322 Rossetti, G. & Cazabet, R. (2018). Community discovery in dynamic networks: a survey.  
323 *ACM Computing Surveys (CSUR)*, 51, 35.
- 324 Thébault, E. & Fontaine, C. (2010). Stability of ecological communities and the architecture  
325 of mutualistic and trophic networks. *Science*, 329, 853–856.
- 326 Vázquez, D. P. & Aizen, M. A. (2004). Asymmetric specialization: a pervasive feature of  
327 plant–pollinator interactions. *Ecology*, 85, 1251–1257.



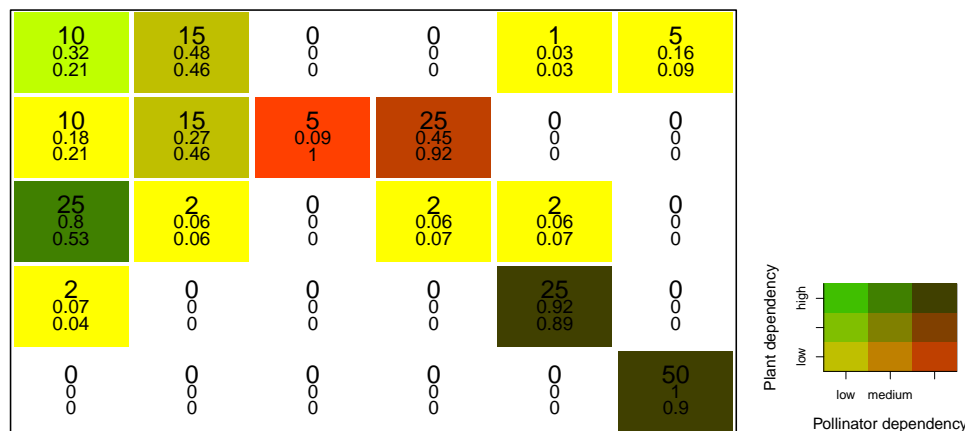

Figure 1: Representation of a dependence network between 5 plants (rows) and 6 pollinators (columns). Each cell is colored according to the legend and filled with the number of visits, the plant and pollinator dependence values  $D_{ij}$  and  $D_{ji}$  successively. The legend shows the color code accounting for the two dependence values for any species pair  $(i, j)$  (the greener, the higher the plant dependence; the more red, the higher the pollinator dependence). This example shows the advantage of studying dependence values instead of raw data. The number of visits in cells (3,1), (2,4) and (4,5) are all equal to 25. Meanwhile, these number of visits do not characterize the same kind of interaction, as shown by the dependence values. Indeed, plant 3 is highly dependent on pollinator 1 (the reverse is not true), pollinator 4 is highly dependent on plant 2 (the reverse is not true) whereas plant 4 and pollinator 5 are mutually dependent and have a quasi-exclusive relationship. Lastly, the number of visits in cell (5,6) is twice the number in cell (4,5) but the dependence values are comparable (dependence is scale invariant).

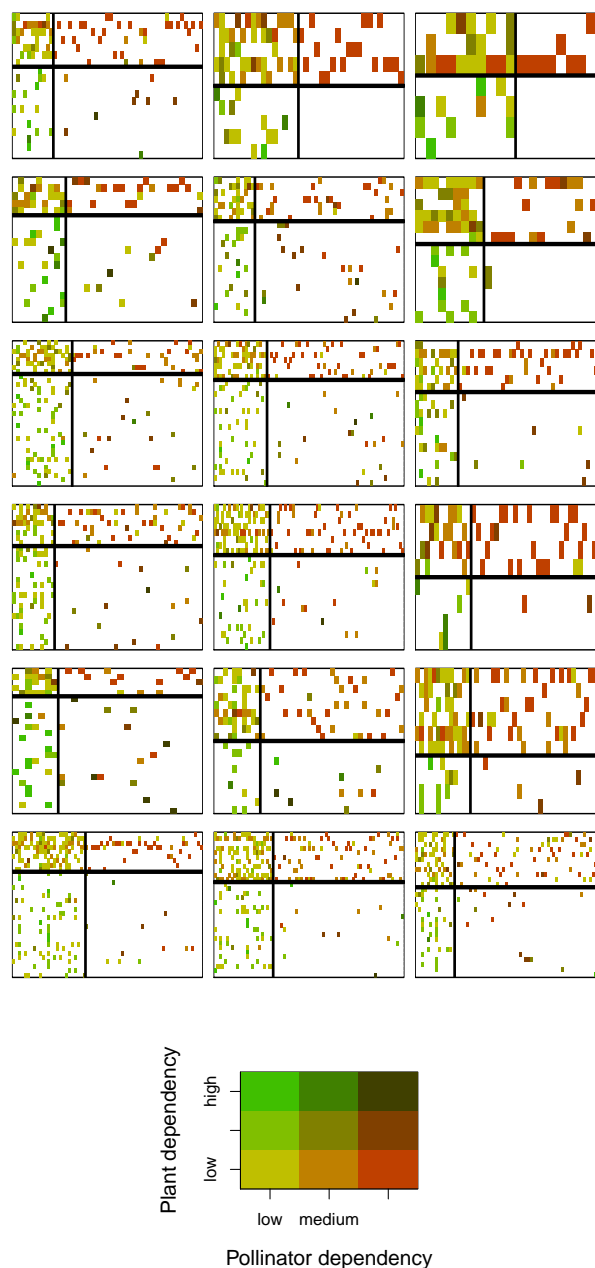

Figure 2: Representation of the 18 dependence networks into colored matrices. For any matrix, each cell represents the plant and pollinator dependence values between any species of plants (rows) and pollinators (columns), with a color computed as a mixture of the two dependence values according to the legend. Rows and columns were reorganized according to the dynSBM group membership: dark lines separating each matrix delineate the group boundaries (first/second group of plants above/below the horizontal line; first/second group of pollinators on the left/right of the vertical line).

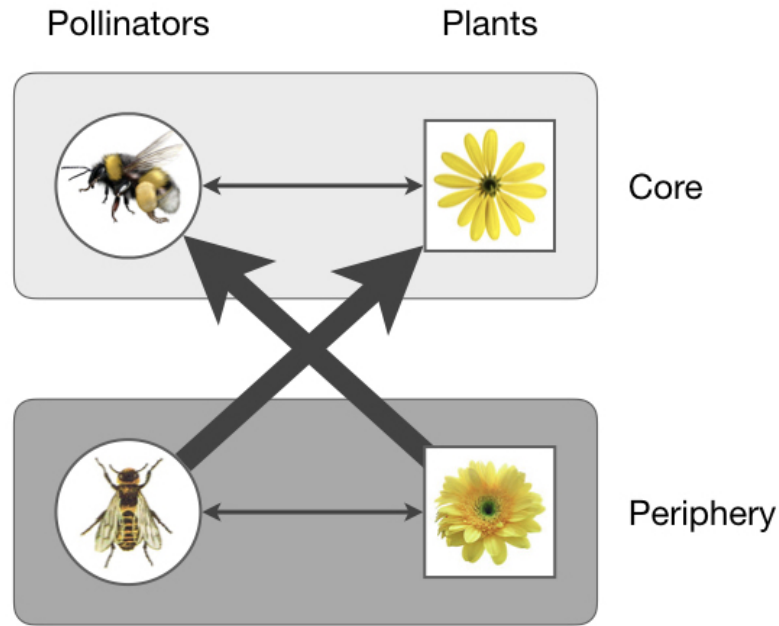

Figure 3: Graphical representation of the core-periphery structure found in our dynamic plant-pollinator network. Arrows depict dependences of one species (arrow origin) on another (arrow tip). Arrow widths are proportional to typical dependence values between groups. Pollinators/plants of the network periphery are strongly dependent on plants/pollinators that belong to the network core.

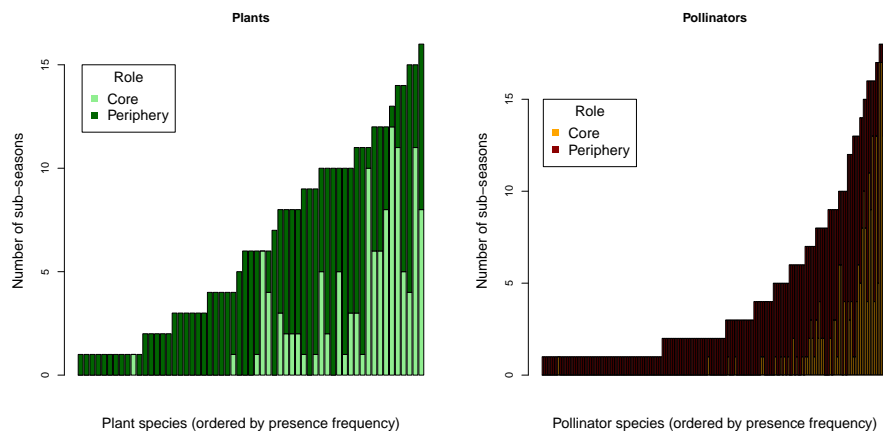

Figure 4: Species' role shifts and temporal occurrence. Each stacked bar (one by species) represents the number of sub-seasons any species was found in the core (light color) or in the periphery (dark color). Bars were ranked according to the number of sub-seasons any species was observed and present in the network. For plants (left) and pollinators (right).
